# Supplementary material for: Sex-Specific Disparities in Outcomes of Transcatheter Edge-to-Edge Repair for Mitral Regurgitation: A Multicenter “Real-World” Analysis
Source: MDPI journal article supplement (doi:10.3390/jcm12237231), 2023-11-22
Supplement: s1 [file s1]

**Table S1: Comparison of clinical and procedural characteristics of patients lost to follow-up in comparison with those of patients not lost to follow-up.** Data presented as percentages or mean  $\pm$  SD. \* - Data presented as median with interquartile range (IQR). # - MR grade according to American Society of Echocardiography (ASE) classification. AF – atrial fibrillation. COPD – chronic obstructive pulmonary disease. CABG – coronary artery bypass graft surgery. PCI – percutaneous coronary intervention. ICD – implantable cardioverter defibrillator. CRT – cardiac resynchronization therapy. GFR – glomerular filtration rate. LV function – left ventricular function. LA – left atrial. NT-proBNP – N-terminal pro-B-type natriuretic peptide. TR – tricuspid regurgitation. MR – mitral regurgitation. MACCE – major adverse cardiac and cerebrovascular events. AAD – antiarrhythmic drugs. ACE – angiotensin converting enzyme. AT1 – angiotensin II type 1 receptor. ARN – angiotensin receptor neprilysin. SGLT-II – sodium-glucose transporter 2.

| Variable                                 | Patients not lost to FU<br>(n=766) | Patients lost to FU<br>(n=55) | p-value |
|------------------------------------------|------------------------------------|-------------------------------|---------|
| Age (years)                              | 78 $\pm$ 8                         | 79 $\pm$ 7                    | 0.1     |
| euroSCORE II*                            | 16.1 (20.8)                        | 12.4 (10.7)                   | 0.3     |
| STS Risk Score*                          | 6.7 (8.4)                          | 5.8 (5.2)                     | 0.1     |
| Male sex                                 | 61.9% (474)                        | 72.7% (40)                    | 0.1     |
| NYHA class I                             | 0.1% (1)                           | 0% (0)                        | 0.3     |
| NYHA class II                            | 3.4% (26)                          | 0% (0)                        |         |
| NYHA class III                           | 75.8% (581)                        | 72.7% (40)                    |         |
| NYHA class IV                            | 20.6% (158)                        | 27.3% (15)                    |         |
| COPD                                     | 18.3% (140)                        | 10.9% (6)                     | 0.2     |
| CAD                                      | 62.4% (478)                        | 60% (33)                      | 0.8     |
| Prior CAB-OP                             | 28.5% (218)                        | 18.2% (10)                    | 0.1     |
| Prior PCI                                | 53.9% (413)                        | 54.5% (30)                    | 1       |
| Pre-existing ICD                         | 22.5% (172)                        | 20% (11)                      | 0.7     |
| Pacemaker                                | 29.6% (227)                        | 27.3% (15)                    | 0.8     |
| CRT                                      | 14.4% (110)                        | 14.5% (8)                     | 1       |
| Diabetes mellitus                        | 30.4% (233)                        | 21.8% (12)                    | 0.2     |
| Arterial hypertension                    | 81.5% (624)                        | 74.5% (41)                    | 0.2     |
| Prior Stroke                             | 9.4% (72)                          | 14.5% (8)                     | 0.2     |
| LVEF $\geq$ 50%                          | 38.8% (297)                        | 45.5% (25)                    | 0.3     |
| LVEF 41-49%                              | 11.4% (87)                         | 14.5% (8)                     |         |
| LVEF $\leq$ 40%                          | 49.9% (382)                        | 40% (22)                      |         |
| Atrial fibrillation                      | 73.9% (566)                        | 76.4% (42)                    | 0.8     |
| GFR (mL/Min)                             | 50 $\pm$ 26                        | 53 $\pm$ 19                   | 0.3     |
| NT-proBNP (ng/L)*                        | 2299 (4923)                        | 2050 (5234)                   | 0.6     |
| AF patients after PVI                    | 5.9% (45)                          | 5.4% (3)                      | 0.8     |
| TR grade III                             | 17.9% (137)                        | 29.1% (16)                    | 0.06    |
| Degenerative MR etiology                 | 36.9% (278)                        | 27.3% (15)                    | 0.1     |
| Functional MR etiology                   | 52.5% (402)                        | 54.5% (30)                    |         |
| Mixed MR etiology                        | 11.2% (86)                         | 18.2% (10)                    |         |
| Median procedure duration (min)*         | 82 (62)                            | 68 (34)                       | 0.1     |
| Number of clips implanted*               | 1 (1)                              | 1 (0)                         | 0.3     |
| Periprocedural MR reduction#             | $\Delta$ 2.0 $\pm$ 0.6             | $\Delta$ 2.0 $\pm$ 0.3        | 0.6     |
| Length of hospital stay (days)*          | 7 (5)                              | 5 (4)                         | 0.1     |
| Overall-MACCE                            | 5.5% (42)                          | 3.6% (2)                      | 0.8     |
| Cerebral/systemic thromboembolic event   | 0.7% (5)                           | 0% (0)                        | 1       |
| Bleeding requiring intervention          | 3.3% (25)                          | 1.8% (1)                      | 1       |
| In-hospital death from cardiovasc. cause | 2.2% (17)                          | 1.8% (1)                      | 1       |
| In-hospital death from any cause         | 3.7% (28)                          | 1.8% (1)                      | 0.7     |
| <b>Heart Failure Therapy</b>             |                                    |                               |         |
| ACE-/AT1 Inhibitors                      | 72.7% (557)                        | 65.5% (36)                    | 0.3     |
| ARN Inhibitor                            | 13.1% (100)                        | 20% (11)                      | 0.2     |
| Beta Blockers                            | 89.2% (683)                        | 83.6% (46)                    | 0.3     |
| Diuretics                                | 93.1% (713)                        | 89.1% (49)                    | 0.5     |
| Aldosteron antagonists                   | 48.4% (371)                        | 45.5% (25)                    | 0.7     |
| SGLT-II-Inhibitors                       | 4.6% (35)                          | 7.3% (4)                      | 0.5     |
| Vericiguat                               | 0% (0)                             | 1.8% (1)                      | 0.07    |
