# Supplementary material for: Sex-Specific Disparities in Outcomes of Transcatheter Edge-to-Edge Repair for Mitral Regurgitation: A Multicenter “Real-World” Analysis
Source: MDPI journal article supplement (doi:10.3390/jcm12237231), 2023-11-22
Supplement: s1 [file s1]

**Table S4: Clinical and procedural characteristics of female and male patients with concomitant atrial fibrillation before and after propensity score matching.** Data presented as percentages or mean  $\pm$  SD. \* - Data presented as median with interquartile range (IQR). # - MR grade according to American Society of Echocardiography (ASE) classification. AF – atrial fibrillation. COPD – chronic obstructive pulmonary disease. CABG – coronary artery bypass graft surgery. PCI – percutaneous coronary intervention. ICD – implantable cardioverter defibrillator. CRT – cardiac resynchronization therapy. GFR – glomerular filtration rate. LV function – left ventricular function. LA – left atrial. NT-proBNP – N-terminal pro-B-type natriuretic peptide. TR – tricuspid regurgitation. MR – mitral regurgitation. MACCE – major adverse cardiac and cerebrovascular events. AAD – antiarrhythmic drugs. ACE – angiotensin converting enzyme. AT1 – angiotensin II type 1 receptor. ARN – angiotensin receptor neprylisin. SGLT-II – sodium-glucose transporter 2.

| Variable         | Before Propensity-Score-Matching |                   |                 |                  | After Propensity-Score-Matching |                 |                 |
|------------------|----------------------------------|-------------------|-----------------|------------------|---------------------------------|-----------------|-----------------|
|                  | Overall<br>(n=608)               | Female<br>(n=217) | Male<br>(n=391) | <i>p</i> -value  | Female<br>(n=217)               | Male<br>(n=217) | <i>p</i> -value |
| Age (years)      | 78.8 $\pm$ 7.6                   | 80.9 $\pm$ 5.8    | 77.6 $\pm$ 8.3  | <b>&lt;0.001</b> | 80.9 $\pm$ 5.8                  | 81 $\pm$ 5      | 0.7             |
| euroSCORE II*    | 15.9 (21.2)                      | 13 (21)           | 16.5 (21.4)     | 0.08             | 13 (21)                         | 14 (19)         | 0.8             |
| STS Risk Score*  | 7 (8.5)                          | 6.7 (8.6)         | 7 (8.5)         | 0.8              | 6.7 (8.6)                       | 6 (5.9)         | 0.2             |
| NYHA class I     | 0.2% (1)                         | 0.5% (1)          | 0% (0)          | 0.2              | 0.5% (1)                        | 0% (0)          | 0.7             |
| NYHA class II    | 2.8% (17)                        | 1.4% (3)          | 3.6% (14)       |                  | 1.4% (3)                        | 2.8% (6)        |                 |
| NYHA class III   | 75% (456)                        | 77.4% (168)       | 73.7% (288)     |                  | 77.4% (168)                     | 76% (165)       |                 |
| NYHA class IV    | 22% (134)                        | 20.7% (45)        | 22.8% (89)      |                  | 20.7% (45)                      | 21.2% (46)      |                 |
| COPD             | 16.9% (103)                      | 13.8% (30)        | 18.7% (73)      | 0.1              | 13.8% (30)                      | 14.7% (32)      | 0.9             |
| CAD              | 60.5% (368)                      | 50.7% (110)       | 66% (258)       | <b>&lt;0.001</b> | 50.7% (110)                     | 56.2% (122)     | 0.3             |
| Prior CAB-OP     | 25.6% (156)                      | 16.6% (36)        | 30.7% (120)     | <b>&lt;0.001</b> | 16.6% (36)                      | 18% (39)        | 0.8             |
| Prior PCI        | 52.6% (320)                      | 47.9% (104)       | 55.2% (216)     | 0.09             | 47.9% (104)                     | 53% (115)       | 0.3             |
| Pre-existing ICD | 23% (140)                        | 10.1% (22)        | 30.2% (118)     | <b>&lt;0.001</b> | 10.1% (22)                      | 12% (26)        | 0.6             |

|                                  |             |             |             |                  |             |             |                  |
|----------------------------------|-------------|-------------|-------------|------------------|-------------|-------------|------------------|
| Pre-existing CRT                 | 15.1% (92)  | 8.8% (19)   | 18.7% (73)  | <b>&lt;0.001</b> | 8.8% (19)   | 11.1% (24)  | 0.5              |
| Diabetes mellitus                | 29.4% (179) | 28.1% (61)  | 30.2% (118) | 0.6              | 28.1% (61)  | 27.2% (59)  | 0.9              |
| Arterial hypertension            | 82.7% (503) | 83.4% (181) | 82.4% (322) | 0.8              | 83.4% (181) | 82.9% (180) | 1                |
| Prior Stroke                     | 10.5% (64)  | 10.1% (22)  | 10.7% (42)  | 0.9              | 10.1% (22)  | 9.2% (20)   | 0.9              |
| LVEF ≥50%                        | 46% (280)   | 52.5% (144) | 34.8% (136) | <b>&lt;0.001</b> | 52.5% (144) | 49.3% (107) | 0.7              |
| LVEF 41-49%                      | 12.3% (75)  | 14.7% (32)  | 11% (43)    |                  | 14.7% (32)  | 13.8% (30)  |                  |
| LVEF ≤40%                        | 46.5% (283) | 32.7% (71)  | 54.2% (212) |                  | 32.7% (71)  | 36.9% (80)  |                  |
| Paroxysmal AF                    | 29.1% (177) | 31.3% (68)  | 27.9% (109) | 0.4              | 31.3% (68)  | 24.9% (54)  | 0.1              |
| Persistent AF                    | 32.1% (195) | 33.6% (73)  | 31.2% (122) |                  | 33.6% (73)  | 30.9% (67)  |                  |
| Permanent AF                     | 38.8% (236) | 35% (76)    | 40.9% (160) |                  | 35% (76)    | 44.2% (96)  |                  |
| GFR (mL/Min)                     | 49 ± 26     | 46 ± 20     | 51 ± 28     | <b>0.02</b>      | 46 ± 20     | 50 ± 32     | 0.1              |
| NT-proBNP (ng/L)*                | 2294 (4810) | 1888 (3857) | 2473 (5049) | 0.1              | 1888 (3857) | 2691 (4796) | 0.1              |
| TR grade III                     | 21.4% (130) | 24% (52)    | 19.9% (78)  | 0.3              | 24% (52)    | 20.7% (45)  | 0.5              |
| Degenerative MR etiology         | 35.7% (217) | 40.1% (87)  | 33.2% (130) | 0.1              | 40.1% (87)  | 36.4% (79)  | 0.7              |
| Functional MR etiology           | 51.4% (314) | 46.1% (100) | 54.7% (214) |                  | 46.1% (100) | 47.9% (104) |                  |
| Mixed MR etiology                | 12.7% (77)  | 13.8% (30)  | 12% (47)    |                  | 13.8% (30)  | 15.7% (34)  |                  |
| Median procedure duration (min)* | 80 (60)     | 74 (55)     | 83 (63)     | <b>0.01</b>      | 74 (55)     | 80 (57)     | 0.2              |
| Number of clips implanted*       | 1 (1)       | 1 (1)       | 2 (1)       | <b>&lt;0.001</b> | 1 (1)       | 2 (1)       | <b>&lt;0.001</b> |
| Periprocedural MR reduction      | Δ2 ± 0.6    | Δ2 ± 0.5    | Δ2 ± 0.6    | 0.3              | Δ2 ± 0.5    | Δ2 ± 0.6    | 0.4              |

|                                                 |                  |                 |                  |              |                 |                 |             |
|-------------------------------------------------|------------------|-----------------|------------------|--------------|-----------------|-----------------|-------------|
| (carpentier grade)                              |                  |                 |                  |              |                 |                 |             |
| Length of hospital stay (days)*                 | 6 (5)            | 7 (5)           | 6 (5)            | <b>0.03</b>  | 7 (5)           | 6 (5)           | <b>0.03</b> |
| Overall-MACCE                                   | 4.9% (30)        | 4.1% (9)        | 5.4% (21)        | 0.6          | 4.1% (9)        | 6.5% (14)       | 0.4         |
| <i>Cerebral/systemic thromboembolic event</i>   | <i>0.6% (4)</i>  | <i>0.5% (1)</i> | <i>0.8% (3)</i>  | <i>1</i>     | <i>0.5% (1)</i> | <i>0.5% (1)</i> | <i>1</i>    |
| <i>Bleeding requiring intervention</i>          | <i>2.9% (18)</i> | <i>2.8% (6)</i> | <i>3.1% (12)</i> | <i>1</i>     | <i>2.8% (6)</i> | <i>2.7% (8)</i> | <i>0.8</i>  |
| <i>In-hospital death from cardiovasc. cause</i> | <i>2.1% (13)</i> | <i>1.8% (4)</i> | <i>2.3% (9)</i>  | <i>0.8</i>   | <i>1.8% (4)</i> | <i>3.2% (7)</i> | <i>0.5</i>  |
| In-hospital death from any cause                | 3.3% (20)        | 2.3% (5)        | 3.8% (15)        | 0.4          | 2.3% (5)        | 4.1% (9)        | 0.4         |
| <b>Heart Failure Therapy</b>                    |                  |                 |                  |              |                 |                 |             |
| ACE-/AT1 Inhibitors                             | 72% (439)        | 75.1% (163)     | 70.6% (276)      | 0.3          | 75.1% (163)     | 77.4% (168)     | 0.7         |
| ARN Inhibitor                                   | 13.7% (83)       | 8.3% (18)       | 16.6% (65)       | <b>0.004</b> | 8.3% (18)       | 10.1% (22)      | 0.6         |
| Beta Blockers                                   | 89.1% (542)      | 90.8% (197)     | 88.2% (345)      | 0.4          | 90.8% (197)     | 86.6% (188)     | 0.2         |
| Loop diuretics                                  | 91.6% (557)      | 93.1% (202)     | 90.8% (355)      | 0.4          | 93.1% (202)     | 94% (204)       | 0.8         |
| Thiazid diuretics                               | 17.8% (108)      | 16.1% (35)      | 18.7% (73)       | 0.5          | 16.1% (35)      | 18% (39)        | 0.7         |
| Aldosteron antagonists                          | 48.8% (297)      | 46.5% (101)     | 50.1% (196)      | 0.4          | 46.5% (101)     | 44.7% (97)      | 0.8         |
| Ivabradin                                       | 0.6% (4)         | 0.5% (1)        | 0.8% (3)         | 1            | 0.5% (1)        | 0.5% (1)        | 1           |
| Digitalis                                       | 9% (55)          | 8.3% (18)       | 9.5% (37)        | 0.7          | 8.3% (18)       | 7.4% (16)       | 0.9         |
| SGLT-II-Inhibitors                              | 4.3% (26)        | 2.3% (5)        | 5.4% (21)        | 0.09         | 2.3% (5)        | 5.1% (11)       | 0.2         |
| Vericiguat                                      | 0.2% (1)         | 0% (0)          | 0.3% (1)         | 1            | 0% (0)          | 0% (0)          | 1           |
| <b>Atrial Fibrillation Therapy</b>              |                  |                 |                  |              |                 |                 |             |

|                          |             |             |             |     |             |             |     |
|--------------------------|-------------|-------------|-------------|-----|-------------|-------------|-----|
| Rate Control             | 49.2% (299) | 52.1% (113) | 52.4% (186) | 0.9 | 52.1% (113) | 57.1% (124) | 0.3 |
| Beta Blockers            | 47% (286)   | 47% (102)   | 46.5% (182) | 0.7 | 47% (102)   | 48.8% (106) | 1   |
| Additional Pacemaker     | 8.1% (49)   | 7.4% (16)   | 8.4% (33)   | 0.8 | 7.4% (16)   | 8.8% (19)   | 0.7 |
| Additional Digitalis     | 6.7% (41)   | 6.5% (14)   | 6.9% (27)   | 0.9 | 6.5% (14)   | 6.5% (1)    | 1   |
| Rhythm Control           | 47.7% (290) | 47.9% (104) | 47.6% (186) | 0.9 | 47.9% (104) | 42.9% (93)  | 0.3 |
| Class-I-AAD              | 0.3% (2)    | 0.9% (2)    | 0% (0)      | 0.1 | 0.9% (2)    | 0% (0)      | 0.5 |
| Class-II-AAD             | 27.1% (165) | 30.4% (66)  | 25.3% (99)  | 0.2 | 30.4% (66)  | 24.4% (53)  | 0.2 |
| Class-III-AAD            | 2.3% (14)   | 3.2% (7)    | 1.8% (7)    | 0.3 | 3.2% (7)    | 2.8% (6)    | 1   |
| Class-II + Class-III-AAD | 14% (85)    | 11.5% (25)  | 15.3% (60)  | 0.2 | 11.5% (25)  | 12% (26)    | 1   |
| Additional PVI           | 7.9% (48)   | 6.5% (14)   | 8.7% (34)   | 0.4 | 6.5% (14)   | 6.9% (15)   | 1   |
| Oral anticoagulants      |             |             |             |     |             |             |     |
| VKA                      | 45.1% (274) | 45.2% (98)  | 45% (176)   | 1   | 45.2% (98)  | 42.9% (93)  | 0.7 |
| NOAC                     | 48% (292)   | 49.3% (107) | 47.3% (185) | 0.7 | 49.3% (107) | 49.8% (108) | 1   |
