# Supplementary material for: Sex-Specific Disparities in Outcomes of Transcatheter Edge-to-Edge Repair for Mitral Regurgitation: A Multicenter “Real-World” Analysis
Source: MDPI journal article supplement (doi:10.3390/jcm12237231), 2023-11-22
Supplement: s1 [file s1]

**Table S2: Clinical and procedural characteristics of male patients with and without concomitant atrial fibrillation before and after propensity score matching.** Data presented as percentages or mean  $\pm$  SD. \* - Data presented as median with interquartile range (IQR). # - MR grade according to American Society of Echocardiography (ASE) classification. AF – atrial fibrillation. COPD – chronic obstructive pulmonary disease. CABG – coronary artery bypass graft surgery. PCI – percutaneous coronary intervention. ICD – implantable cardioverter defibrillator. CRT – cardiac resynchronization therapy. GFR – glomerular filtration rate. LV function – left ventricular function. LA – left atrial. NT-proBNP – N-terminal pro-B-type natriuretic peptide. TR – tricuspid regurgitation. MR – mitral regurgitation. MACCE – major adverse cardiac and cerebrovascular events. AAD – antiarrhythmic drugs. ACE – angiotensin converting enzyme. AT1 – angiotensin II type 1 receptor. ARN – angiotensin receptor neprylisin. SGLT-II – sodium-glucose transporter 2.

| Variable         | Before Propensity Score Matching |                  |                |             | After Propensity Score Matching |               |         |
|------------------|----------------------------------|------------------|----------------|-------------|---------------------------------|---------------|---------|
|                  | Overall<br>(n=514)               | No AF<br>(n=123) | AF<br>(n=391)  | p-value     | No AF<br>(n=123)                | AF<br>(n=246) | p-value |
| Age (years)      | 77.0 $\pm$ 8.5                   | 75.0 $\pm$ 9     | 77.6 $\pm$ 8.3 | <b>0.01</b> | 75.0 $\pm$ 9                    | 76.0 $\pm$ 8  | 0.3     |
| euroSCORE II*    | 16.5 (20.2)                      | 16.7 (18.5)      | 16.5 (21.4)    | 0.7         | 16.7 (18.5)                     | 18.3 (21.9)   | 0.3     |
| STS Risk Score*  | 7 (8.6)                          | 6.9 (8.8)        | 7 (8.5)        | 0.4         | 6.9 (8.8)                       | 7 (8.7)       | 0.4     |
| NYHA class I     | 0% (0)                           | 0% (0)           | 0% (0)         | 0.6         | 0% (0)                          | 0% (0)        | 0.3     |
| NYHA class II    | 3.3% (17)                        | 2.4% (3)         | 3.6% (14)      |             | 2.4% (3)                        | 2.4% (6)      |         |
| NYHA class III   | 74.9% (385)                      | 78.9% (97)       | 73.7% (288)    |             | 78.9% (97)                      | 71.5% (176)   |         |
| NYHA class IV    | 21.8% (112)                      | 18.7% (23)       | 22.8% (89)     |             | 18.7% (23)                      | 26% (64)      |         |
| COPD             | 19.3% (99)                       | 21.1% (26)       | 18.7% (73)     | 0.6         | 21.1% (26)                      | 21.5% (53)    | 1       |
| CAD              | 67.7% (348)                      | 73.2% (90)       | 66% (258)      | 0.2         | 73.2% (90)                      | 74% (182)     | 0.9     |
| Prior CAB-OP     | 33.5% (172)                      | 42.3% (52)       | 30.7% (120)    | <b>0.02</b> | 42.3% (52)                      | 34.1% (84)    | 0.1     |
| Prior PCI        | 56% (288)                        | 58.5% (72)       | 55.2% (216)    | 0.5         | 58.5% (72)                      | 58.1% (143)   | 1       |
| Pre-existing ICD | 30% (154)                        | 29.3% (36)       | 30.2% (118)    | 0.9         | 29.3% (36)                      | 35.8% (88)    | 0.2     |

|                                               |                 |                 |                 |             |                 |                 |          |
|-----------------------------------------------|-----------------|-----------------|-----------------|-------------|-----------------|-----------------|----------|
| Pre-existing CRT                              | 18.7% (96)      | 18.7% (23)      | 18.7% (73)      | 1           | 18.7% (23)      | 21.1% (52)      | 0.7      |
| Diabetes mellitus                             | 30.5% (157)     | 31.7% (39)      | 30.2% (118)     | 0.7         | 31.7% (39)      | 32.1% (79)      | 1        |
| Arterial hypertension                         | 82.1% (422)     | 81.3% (100)     | 82.4% (322)     | 0.8         | 81.3% (100)     | 81.7% (201)     | 1        |
| Prior Stroke                                  | 9.7% (50)       | 6.5% (8)        | 10.7% (42)      | 0.2         | 6.5% (8)        | 10.6% (26)      | 0.3      |
| LVEF ≥50%                                     | 32.5% (167)     | 25.2% (31)      | 34.8% (136)     | 0.08        | 25.2% (31)      | 27.6% (68)      | 0.7      |
| LVEF 41-49%                                   | 10.5% (54)      | 8.9% (11)       | 11% (43)        |             | 8.9% (11)       | 11% (27)        |          |
| LVEF ≤40%                                     | 57% (293)       | 65.9% (81)      | 54.2% (212)     |             | 65.9% (81)      | 61.4% (151)     |          |
| GFR (mL/Min)                                  | 51 ± 28         | 54 ± 26         | 51 ± 28         | 0.3         | 54 ± 26         | 54 ± 21         | 0.3      |
| NT-proBNP (ng/L)*                             | 2463 (5288)     | 2069 (6005)     | 2473 (5049)     | 0.6         | 2069 (6005)     | 2466 (5232)     | 0.7      |
| TR grade III                                  | 17.9% (92)      | 11.4% (14)      | 19.9% (78)      | <b>0.03</b> | 11.4% (14)      | 10.2% (25)      | 0.7      |
| Degenerative MR etiology                      | 33.9% (174)     | 35.8% (44)      | 33.2% (130)     | 0.2         | 35.8% (44)      | 30.9% (76)      | 0.6      |
| Functional MR etiology                        | 55.4% (285)     | 57.7% (71)      | 54.7% (214)     |             | 57.7% (71)      | 60.6% (149)     |          |
| Mixed MR etiology                             | 10.7% (55)      | 6.5% (8)        | 12% (47)        |             | 6.5% (8)        | 8.5% (21)       |          |
| Median procedure duration (min)*              | 83 (63)         | 85 (62)         | 83 (63)         | 0.9         | 85 (62)         | 82 (63)         | 0.9      |
| Number of clips implanted*                    | 2 (1)           | 2 (1)           | 2 (1)           | 1           | 2 (1)           | 2 (1)           | 0.8      |
| Periprocedural MR reduction <sup>#</sup>      | Δ2.1 ± 0.6      | Δ2.0 ± 0.6      | Δ2.1 ± 0.6      | 0.3         | Δ2.0 ± 0.6      | Δ2.1 ± 0.6      | 0.4      |
| Length of hospital stay (days)*               | 6 (5)           | 6 (5)           | 6 (5)           | 0.6         | 6 (5)           | 6 (5)           | 0.9      |
| Overall-MACCE                                 | 5.6% (29)       | 6.5% (8)        | 5.4% (21)       | 0.7         | 6.5% (8)        | 5.7% (14)       | 0.8      |
| <i>Cerebral/systemic thromboembolic event</i> | <i>0.8% (4)</i> | <i>0.8% (1)</i> | <i>0.8% (3)</i> | <i>1</i>    | <i>0.8% (1)</i> | <i>0.8% (1)</i> | <i>1</i> |

|                                                 |             |             |             |                  |             |             |              |
|-------------------------------------------------|-------------|-------------|-------------|------------------|-------------|-------------|--------------|
| <i>Bleeding requiring intervention</i>          | 3.1% (16)   | 3.3% (4)    | 3.1% (12)   | 1                | 3.3% (4)    | 3.3% (8)    | 1            |
| <i>In-hospital death from cardiovasc. cause</i> | 2.3% (12)   | 2.4% (3)    | 2.3% (9)    | 1                | 2.4% (3)    | 2.4% (6)    | 1            |
| In-hospital death from any cause                | 4% (21)     | 4.9% (6)    | 3.8% (15)   | 0.6              | 4.9% (6)    | 4.5% (11)   | 1            |
| <b>Heart Failure Therapy</b>                    |             |             |             |                  |             |             |              |
| ACE-/AT1 Inhibitors                             | 69.6% (358) | 66.7% (82)  | 70.6% (276) | 0.4              | 66.7% (82)  | 67.1% (165) | 1            |
| ARN Inhibitor                                   | 16.7% (86)  | 17.1% (21)  | 16.6% (65)  | 0.9              | 17.1% (21)  | 19.9% (49)  | 0.6          |
| Beta Blockers                                   | 88.1% (453) | 87.8% (108) | 88.2% (345) | 0.9              | 87.8% (108) | 88.6% (218) | 0.9          |
| Loop diuretics                                  | 89.7% (461) | 86.2% (106) | 90.8% (355) | 0.2              | 86.2% (106) | 89% (219)   | 0.5          |
| Thiazid diuretics                               | 18.7% (96)  | 18.7% (23)  | 18.7% (73)  | 1                | 18.7% (23)  | 18.3% (45)  | 1            |
| Aldosteron antagonists                          | 50.2% (258) | 50.4% (62)  | 50.1% (196) | 1                | 50.4% (62)  | 49.6% (122) | 0.9          |
| Ivabradin                                       | 1.6% (8)    | 4.1% (5)    | 0.8% (3)    | <b>0.02</b>      | 4.1% (5)    | 1.2% (3)    | 0.1          |
| Digitalis                                       | 7.4% (38)   | 0.8% (1)    | 9.5% (37)   | <b>&lt;0.001</b> | 0.8% (1)    | 8.5% (21)   | <b>0.002</b> |
| SGLT-II-Inhibitors                              | 6% (31)     | 8.1% (10)   | 5.4% (21)   | 0.3              | 8.1% (10)   | 4.1% (10)   | 0.1          |
| Vericiguat                                      | 0.2% (1)    | 0% (0)      | 0.3% (1)    | 1                | 0% (0)      | 0.4% (1)    | 1            |
