# Supplementary material for: Sex-Specific Disparities in Outcomes of Transcatheter Edge-to-Edge Repair for Mitral Regurgitation: A Multicenter “Real-World” Analysis
Source: MDPI journal article supplement (doi:10.3390/jcm12237231), 2023-11-22
Supplement: s1 [file s1]

**Table S3: Clinical and procedural characteristics of female patients with and without concomitant atrial fibrillation before and after propensity score matching.** Data presented as percentages or mean  $\pm$  SD. \* - Data presented as median with interquartile range (IQR). # - MR grade according to American Society of Echocardiography (ASE) classification. AF – atrial fibrillation. COPD – chronic obstructive pulmonary disease. CABG – coronary artery bypass graft surgery. PCI – percutaneous coronary intervention. ICD – implantable cardioverter defibrillator. CRT – cardiac resynchronization therapy. GFR – glomerular filtration rate. LV function – left ventricular function. LA – left atrial. NT-proBNP – N-terminal pro-B-type natriuretic peptide. TR – tricuspid regurgitation. MR – mitral regurgitation. MACCE – major adverse cardiac and cerebrovascular events. AAD – antiarrhythmic drugs. ACE – angiotensin converting enzyme. AT1 – angiotensin II type 1 receptor. ARN – angiotensin receptor neprylisin. SGLT-II – sodium-glucose transporter 2.

| Variable         | Before Propensity-Score-Matching |                 |               |                 | After Propensity-Score-Matching |              |                 |
|------------------|----------------------------------|-----------------|---------------|-----------------|---------------------------------|--------------|-----------------|
|                  | Overall<br>(n=307)               | No AF<br>(n=90) | AF<br>(n=217) | <i>p</i> -value | No AF<br>(n=90)                 | AF<br>(n=90) | <i>p</i> -value |
| Age (years)      | 80.0 $\pm$ 7                     | 79.0 $\pm$ 8    | 81.0 $\pm$ 6  | 0.1             | 79.0 $\pm$ 8                    | 81.0 $\pm$ 8 | 0.9             |
| euroSCORE II*    | 13.1 (20.1)                      | 15 (17)         | 13 (21)       | 0.8             | 15 (17)                         | 13 (15.1)    | 0.7             |
| STS Risk Score*  | 6.1 (7.5)                        | 5.5 (5.5)       | 6.7 (8.6)     | <b>0.008</b>    | 5.5 (5.5)                       | 5.5 (4.7)    | 0.4             |
| NYHA class I     | 0.3% (1)                         | 0% (0)          | 0.5% (1)      | 0.08            | 0% (0)                          | 1.1% (1)     | 0.2             |
| NYHA class II    | 3% (9)                           | 6.7% (6)        | 1.4% (3)      |                 | 6.7% (6)                        | 1.1% (1)     |                 |
| NYHA class III   | 76.9% (236)                      | 75.6% (68)      | 77.4% (168)   |                 | 75.6% (68)                      | 81.1% (73)   |                 |
| NYHA class IV    | 19.9% (61)                       | 17.8% (16)      | 20.7% (45)    |                 | 17.8% (16)                      | 16.7% (15)   |                 |
| COPD             | 15.3% (47)                       | 18.9% (17)      | 13.8% (30)    | 0.3             | 18.9% (17)                      | 14.4% (13)   | 0.5             |
| CAD              | 53.1% (163)                      | 58.9% (53)      | 50.7% (110)   | 0.2             | 58.9% (53)                      | 45.6% (41)   | 0.1             |
| Prior CAB-OP     | 18.2% (56)                       | 22.2% (20)      | 16.6% (36)    | 0.3             | 22.2% (20)                      | 13.3% (12)   | 0.2             |
| Prior PCI        | 50.5% (155)                      | 56.7% (51)      | 47.9% (104)   | 0.2             | 56.7% (51)                      | 44.4% (40)   | 0.1             |
| Pre-existing ICD | 9.4% (29)                        | 7.8% (7)        | 10.4% (22)    | 0.7             | 7.8% (7)                        | 10% (9)      | 0.8             |
| Pre-existing CRT | 7.2% (22)                        | 3.3% (3)        | 8.8% (19)     | 0.1             | 3.3% (3)                        | 10% (9)      | 0.1             |

|                                                 |                  |                 |                 |              |                 |                 |          |
|-------------------------------------------------|------------------|-----------------|-----------------|--------------|-----------------|-----------------|----------|
| Diabetes mellitus                               | 28.7% (88)       | 30% (27)        | 28.1% (61)      | 0.8          | 30% (27)        | 20% (18)        | 0.2      |
| Arterial hypertension                           | 79.2% (243)      | 68.9% (62)      | 83.4% (181)     | <b>0.005</b> | 68.9% (62)      | 68.9% (62)      | 1        |
| Prior Stroke                                    | 9.8% (30)        | 8.9% (8)        | 10.1% (22)      | 0.8          | 8.9% (8)        | 10% (9)         | 1        |
| LVEF ≥50%                                       | 50.5% (155)      | 45.6% (41)      | 52.5% (114)     | 0.2          | 45.6% (41)      | 41.1% (37)      | 0.1      |
| LVEF 41-49%                                     | 13.4% (41)       | 10% (9)         | 14.7% (32)      |              | 10% (9)         | 26.7% (24)      |          |
| LVEF ≤40%                                       | 36.2% (111)      | 44.4% (40)      | 32.7% (71)      |              | 44.4% (40)      | 32.2% (29)      |          |
| GFR (mL/Min)                                    | 49 ± 21          | 55 ± 23         | 46 ± 20         | <b>0.03</b>  | 55 ± 23         | 49 ± 19         | 0.06     |
| NT-proBNP (ng/L)*                               | 1919 (4328)      | 2080 (4437)     | 1888 (3857)     | 0.6          | 2080 (4437)     | 2184 (4555)     | 0.7      |
| TR grade III                                    | 20% (61)         | 10% (9)         | 24% (52)        | <b>0.004</b> | 10% (9)         | 10% (9)         | 1        |
| Degenerative MR etiology                        | 38.8% (119)      | 35.6% (32)      | 40.1% (87)      | 0.6          | 35.6% (32)      | 47.8% (43)      | 0.1      |
| Functional MR etiology                          | 47.9% (147)      | 52.2% (47)      | 46.1% (100)     |              | 52.2% (47)      | 36.7% (33)      |          |
| Mixed MR etiology                               | 13.4% (41)       | 12.2% (11)      | 13.8% (30)      |              | 12.2% (11)      | 15.6% (14)      |          |
| Median procedure duration (min)*                | 75 (54)          | 82 (39)         | 86 (49)         | 1            | 82 (39)         | 78 (47)         | 0.9      |
| Number of clips implanted*                      | 1 (1)            | 1 (1)           | 1 (1)           | 0.4          | 1 (1)           | 1 (1)           | 0.8      |
| Periprocedural MR reduction <sup>#</sup>        | Δ2.0 ± 0.6       | Δ1.9 ± 0.6      | Δ2.0 ± 0.5      | 0.2          | Δ1.9 ± 0.6      | Δ2.1 ± 0.6      | 0.2      |
| Length of hospital stay (days)*                 | 7 (4)            | 6.5 (4)         | 7 (5)           | 0.1          | 6.5 (4)         | 6 (4)           | 0.2      |
| Overall-MACCE                                   | 5.5% (17)        | 6.7% (6)        | 4.1% (9)        | 0.4          | 6.7% (6)        | 4.4% (4)        | 0.7      |
| <i>Cerebral/systemic thromboembolic event</i>   | <i>0.3% (1)</i>  | <i>0% (0)</i>   | <i>0.5% (1)</i> | <i>1</i>     | <i>0% (0)</i>   | <i>0% (0)</i>   | <i>1</i> |
| <i>Bleeding requiring intervention</i>          | <i>3.3% (10)</i> | <i>4.4% (4)</i> | <i>2.8% (6)</i> | <i>0.5</i>   | <i>4.4% (4)</i> | <i>3.3% (3)</i> | <i>1</i> |
| <i>In-hospital death from cardiovasc. cause</i> | <i>2% (6)</i>    | <i>2.2% (2)</i> | <i>1.8% (4)</i> | <i>1</i>     | <i>2.2% (2)</i> | <i>1.1% (1)</i> | <i>1</i> |
| In-hospital death from any cause                | 2.6% (8)         | 3.3% (3)        | 2.3% (5)        | 0.7          | 3.3% (3)        | 3.3% (3)        | 1        |

| Heart Failure Therapy  |             |            |             |              |            |            |      |
|------------------------|-------------|------------|-------------|--------------|------------|------------|------|
| ACE-/AT1 Inhibitors    | 76.5% (235) | 80% (72)   | 75.1% (163) | 0.4          | 80% (72)   | 76.7% (69) | 0.7  |
| ARN Inhibitor          | 8.1% (25)   | 7.8% (7)   | 8.3% (18)   | 1            | 7.8% (7)   | 10% (9)    | 0.8  |
| Beta Blockers          | 89.9% (276) | 87.8% (79) | 90.8% (197) | 0.4          | 87.8% (79) | 92.2% (83) | 0.5  |
| Loop diuretics         | 92.2% (283) | 90% (81)   | 93.1% (202) | 0.4          | 90% (81)   | 88.9% (80) | 1    |
| Thiazid diuretics      | 15.3% (47)  | 13.3% (12) | 16.1% (35)  | 0.6          | 13.3% (12) | 15.6% (14) | 0.8  |
| Aldosteron antagonists | 45% (138)   | 41.1% (37) | 46.5% (101) | 0.4          | 41.1% (37) | 51.1% (46) | 0.2  |
| Ivabradin              | 0.6% (2)    | 1.1% (1)   | 0.5% (1)    | 0.5          | 1.1% (1)   | 0% (0)     | 1    |
| Digitalis              | 5.9% (18)   | 0% (0)     | 8.3% (18)   | <b>0.002</b> | 0% (0)     | 5.6% (5)   | 0.06 |
| SGLT-II-Inhibitors     | 2.6% (8)    | 3.3% (3)   | 2.3% (5)    | 0.7          | 3.3% (3)   | 1.1% (1)   | 0.6  |
| Vericiguat             | 0% (0)      | 0% (0)     | 0% (0)      | 1            | 0% (0)     | 0% (0)     | 1    |
