# Supplementary material for: Sex-Specific Disparities in Outcomes of Transcatheter Edge-to-Edge Repair for Mitral Regurgitation: A Multicenter “Real-World” Analysis
Source: MDPI journal article supplement (doi:10.3390/jcm12237231), 2023-11-22
Supplement: s1 [file s1]

**Table S5: Clinical and procedural characteristics of female and male patients without concomitant atrial fibrillation before and after propensity score matching.** Data presented as percentages or mean  $\pm$  SD. \* - Data presented as median with interquartile range (IQR). # - MR grade according to American Society of Echocardiography (ASE) classification. AF – atrial fibrillation. COPD – chronic obstructive pulmonary disease. CABG – coronary artery bypass graft surgery. PCI – percutaneous coronary intervention. ICD – implantable cardioverter defibrillator. CRT – cardiac resynchronization therapy. GFR – glomerular filtration rate. LV function – left ventricular function. LA – left atrial. NT-proBNP – N-terminal pro-B-type natriuretic peptide. TR – tricuspid regurgitation. MR – mitral regurgitation. MACCE – major adverse cardiac and cerebrovascular events. AAD – antiarrhythmic drugs. ACE – angiotensin converting enzyme. AT1 – angiotensin II type 1 receptor. ARN – angiotensin receptor neprylisin. SGLT-II – sodium-glucose transporter 2.

| Variable         | Before Propensity-Score-Matching |                  |                 |                  | After Propensity-Score-Matching |                |                 |
|------------------|----------------------------------|------------------|-----------------|------------------|---------------------------------|----------------|-----------------|
|                  | Overall<br>(n=213)               | Female<br>(n=90) | Male<br>(n=123) | <i>p</i> -value  | Female<br>(n=90)                | Male<br>(n=90) | <i>p</i> -value |
| Age (years)      | 77 $\pm$ 9                       | 79 $\pm$ 8       | 75 $\pm$ 9      | <b>&lt;0.001</b> | 79 $\pm$ 8                      | 77 $\pm$ 8     | 0.06            |
| euroSCORE II*    | 16 (18.1)                        | 15 (17.1)        | 16.7 (18.5)     | 0.5              | 15 (17.1)                       | 16 (19.6)      | 0.5             |
| STS Risk Score*  | 5.9 (7.6)                        | 5.5 (5.5)        | 6.9 (8.8)       | 0.06             | 5.5 (5.5)                       | 6 (7.4)        | 0.4             |
| NYHA class I     | 0% (0)                           | 0% (0)           | 0% (0)          | 0.3              | 0% (0)                          | 0% (0)         | 0.4             |
| NYHA class II    | 4.2% (9)                         | 6.7% (6)         | 2.4% (3)        |                  | 6.7% (6)                        | 2.2% (6)       |                 |
| NYHA class III   | 77.5% (165)                      | 75.6% (68)       | 78.9% (97)      |                  | 75.6% (68)                      | 80% (68)       |                 |
| NYHA class IV    | 18% (39)                         | 17.8% (16)       | 18.7% (23)      |                  | 17.8% (16)                      | 17.8% (16)     |                 |
| COPD             | 20.2% (43)                       | 18.9% (17)       | 21.1% (26)      | 0.7              | 18.9% (17)                      | 18.9% (17)     | 1               |
| CAD              | 67.1% (143)                      | 58.9% (53)       | 73.2% (90)      | <b>0.04</b>      | 58.9% (53)                      | 66.7% (60)     | 0.4             |
| Prior CAB-OP     | 33.8% (72)                       | 22.2% (20)       | 42.3% (52)      | <b>0.003</b>     | 22.2% (20)                      | 32.2% (29)     | 0.2             |
| Prior PCI        | 57.7% (123)                      | 56.7% (51)       | 58.5% (72)      | 0.9              | 56.7% (51)                      | 54.4% (49)     | 0.9             |
| Pre-existing ICD | 20.2% (43)                       | 7.8% (7)         | 29.3% (36)      | <b>&lt;0.001</b> | 7.8% (7)                        | 11.1% (10)     | 0.6             |

|                                          |             |             |             |                  |             |             |      |
|------------------------------------------|-------------|-------------|-------------|------------------|-------------|-------------|------|
| Pre-existing CRT                         | 12.2% (26)  | 3.3% (3)    | 18.7% (23)  | <b>&lt;0.001</b> | 3.3% (3)    | 12.2% (11)  | 0.06 |
| Diabetes mellitus                        | 31% (66)    | 30% (27)    | 31.7% (39)  | 0.9              | 30% (27)    | 31.1% (28)  | 1    |
| Arterial hypertension                    | 76.1% (162) | 68.9% (62)  | 81.3% (100) | <b>0.05</b>      | 68.9% (62)  | 81.1% (73)  | 0.08 |
| Prior Stroke                             | 7.4% (16)   | 8.9% (8)    | 6.5% (8)    | 0.6              | 8.9% (8)    | 6.7% (6)    | 0.8  |
| LVEF ≥50%                                | 33.8% (72)  | 45.6% (41)  | 25.2% (31)  | <b>0.004</b>     | 45.6% (41)  | 32.2% (29)  | 0.2  |
| LVEF 41-49%                              | 9.4% (20)   | 10% (9)     | 8.9% (11)   |                  | 10% (9)     | 11.1% (10)  |      |
| LVEF ≤40%                                | 56.8% (121) | 44.4% (40)  | 65.9% (81)  |                  | 44.4% (40)  | 56.7% (51)  |      |
| GFR (mL/Min)                             | 54 ± 25     | 54.9 ± 23   | 53.5 ± 26   | 0.7              | 54.9 ± 23   | 54 ± 26     | 0.8  |
| NT-proBNP (ng/L)*                        | 2069 (5727) | 2080 (4437) | 2069 (6005) | 0.4              | 2080 (4437) | 2068 (6807) | 0.4  |
| TR grade III                             | 10.8% (23)  | 10% (9)     | 11.4% (14)  | 0.8              | 10% (9)     | 8.9% (8)    | 1    |
| Degenerative MR etiology                 | 35.7% (76)  | 35.6% (32)  | 35.8% (44)  | 0.3              | 35.6% (32)  | 38.9% (35)  | 0.5  |
| Functional MR etiology                   | 55.4% (118) | 52.2% (47)  | 57.7% (71)  |                  | 52.2% (47)  | 54.4% (49)  |      |
| Mixed MR etiology                        | 8.9% (19)   | 12.2% (11)  | 6.5% (8)    |                  | 12.2% (11)  | 6.7% (6)    |      |
| Median procedure duration (min)*         | 80 (60)     | 77.5 (46.5) | 85 (61.5)   | 0.1              | 77.5 (46.5) | 82 (63)     | 0.2  |
| Number of clips implanted*               | 1 (1)       | 1 (1)       | 1 (2)       | 0.052            | 1 (1)       | 1.5 (1)     | 0.2  |
| Periprocedural MR reduction <sup>#</sup> | Δ2.0 ± 0.6  | Δ1.9 ± 0.6  | Δ2.0 ± 0.6  | 0.3              | Δ1.9 ± 0.6  | Δ2.0 ± 0.6  | 0.4  |
| Length of hospital stay (days)*          | 6 (4)       | 6.5 (4)     | 6 (5)       | 0.6              | 6.5 (4)     | 6 (5)       | 0.5  |
| Overall-MACCE                            | 6.6% (14)   | 6.7% (6)    | 6.5% (8)    | 1                | 6.7% (6)    | 8.9% (8)    | 0.8  |
| Cerebral/systemic thromboembolic event   | 0.5% (1)    | 0% (0)      | 0.8% (1)    | 1                | 0% (0)      | 1.1% (1)    | 1    |

|                                                 |             |            |             |             |            |            |     |
|-------------------------------------------------|-------------|------------|-------------|-------------|------------|------------|-----|
| <i>Bleeding requiring intervention</i>          | 1.9% (4)    | 4.4% (4)   | 3.3% (4)    | 0.7         | 4.4% (4)   | 4.4% (4)   | 1   |
| <i>In-hospital death from cardiovasc. cause</i> | 2.3% (5)    | 2.2% (2)   | 2.4% (3)    | 1           | 2.2% (2)   | 3.3% (3)   | 1   |
| In-hospital death from any cause                | 4.2% (9)    | 3.3% (3)   | 4.9% (6)    | 0.7         | 3.3% (3)   | 4.4% (4)   | 1   |
| <b>Heart Failure Therapy</b>                    |             |            |             |             |            |            |     |
| ACE-/AT1 Inhibitors                             | 72.3% (154) | 80% (72)   | 66.7% (82)  | <b>0.04</b> | 80% (72)   | 68.9% (62) | 0.1 |
| ARN Inhibitor                                   | 13.1% (28)  | 7.8% (7)   | 17.1% (21)  | 0.06        | 7.8% (7)   | 12.2% (11) | 0.5 |
| Beta Blockers                                   | 87.8% (187) | 87.8% (79) | 87.8% (108) | 1           | 87.8% (79) | 86.7% (78) | 1   |
| Loop diuretics                                  | 87.8% (187) | 90% (81)   | 86.2% (106) | 0.5         | 90% (81)   | 86.7% (78) | 0.6 |
| Thiazid diuretics                               | 16.4% (35)  | 13.3% (12) | 18.7% (23)  | 0.4         | 13.3% (12) | 18.9% (17) | 0.4 |
| Aldosteron antagonists                          | 46.5% (99)  | 41.1% (37) | 50.4% (62)  | 0.2         | 41.1% (37) | 50% (45)   | 0.3 |
| Ivabradin                                       | 2.8% (6)    | 1.1% (1)   | 4.1% (5)    | 0.4         | 1.1% (1)   | 3.3% (3)   | 0.6 |
| Digitalis                                       | 0.5% (1)    | 0% (0)     | 0.8% (1)    | 1           | 0% (0)     | 1.1% (1)   | 1   |
| SGLT-II-Inhibitors                              | 6.1% (13)   | 3.3% (3)   | 8.1% (10)   | 0.2         | 3.3% (3)   | 7.8% (7)   | 0.3 |
| Vericiguat                                      | 0% (0)      | 0% (0)     | 0% (0)      | 1           | 0% (0)     | 0% (0)     | 1   |
