# Supplementary material for: Sex-Specific Disparities in Outcomes of Transcatheter Edge-to-Edge Repair for Mitral Regurgitation: A Multicenter “Real-World” Analysis
Source: J Clin Med. 2023 Nov 22;12(23):7231. doi: 10.3390/jcm12237231 (PMC10706895; doi:10.3390/jcm12237231)
Supplement: Supplementary file 1 [file jcm-12-07231-s001.zip]

Archive with 5 entries (5 files):
- Supplemental_Table_S1.pdf
- Supplemental_Table_S2.pdf
- Supplemental_Table_S3.pdf
- Supplemental_Table_S4.pdf
- Supplemental_Table_S5.pdf
